# Supplementary material
Source: PubMed Central journal article supplement (PMC4562395)
Supplement: NIHMS719778-supplement-1.pdf [file NIHMS719778-supplement-1.pdf]

**This Supplementary file accompanies the manuscript:**

Comoglio F, Schlumpf T, Schmid V, Rohs R, Beisel C and Paro R.

High-resolution profiling of *Drosophila* replication start sites reveals a DNA shape and chromatin signature of metazoan origins

**This file contains:**

- (1) Supplemental figures and legends (for Figures S1-S7, associated with Figures 1-7, respectively).
- (2) Supplemental tables and legends (for Tables S1-S2, associated with Experimental Procedures and Figures 5-7, respectively).
- (3) Supplemental experimental procedures (details of experiments and computational analyses).
- (4) Additional supplemental references

# SUPPLEMENTAL FIGURES AND LEGENDS

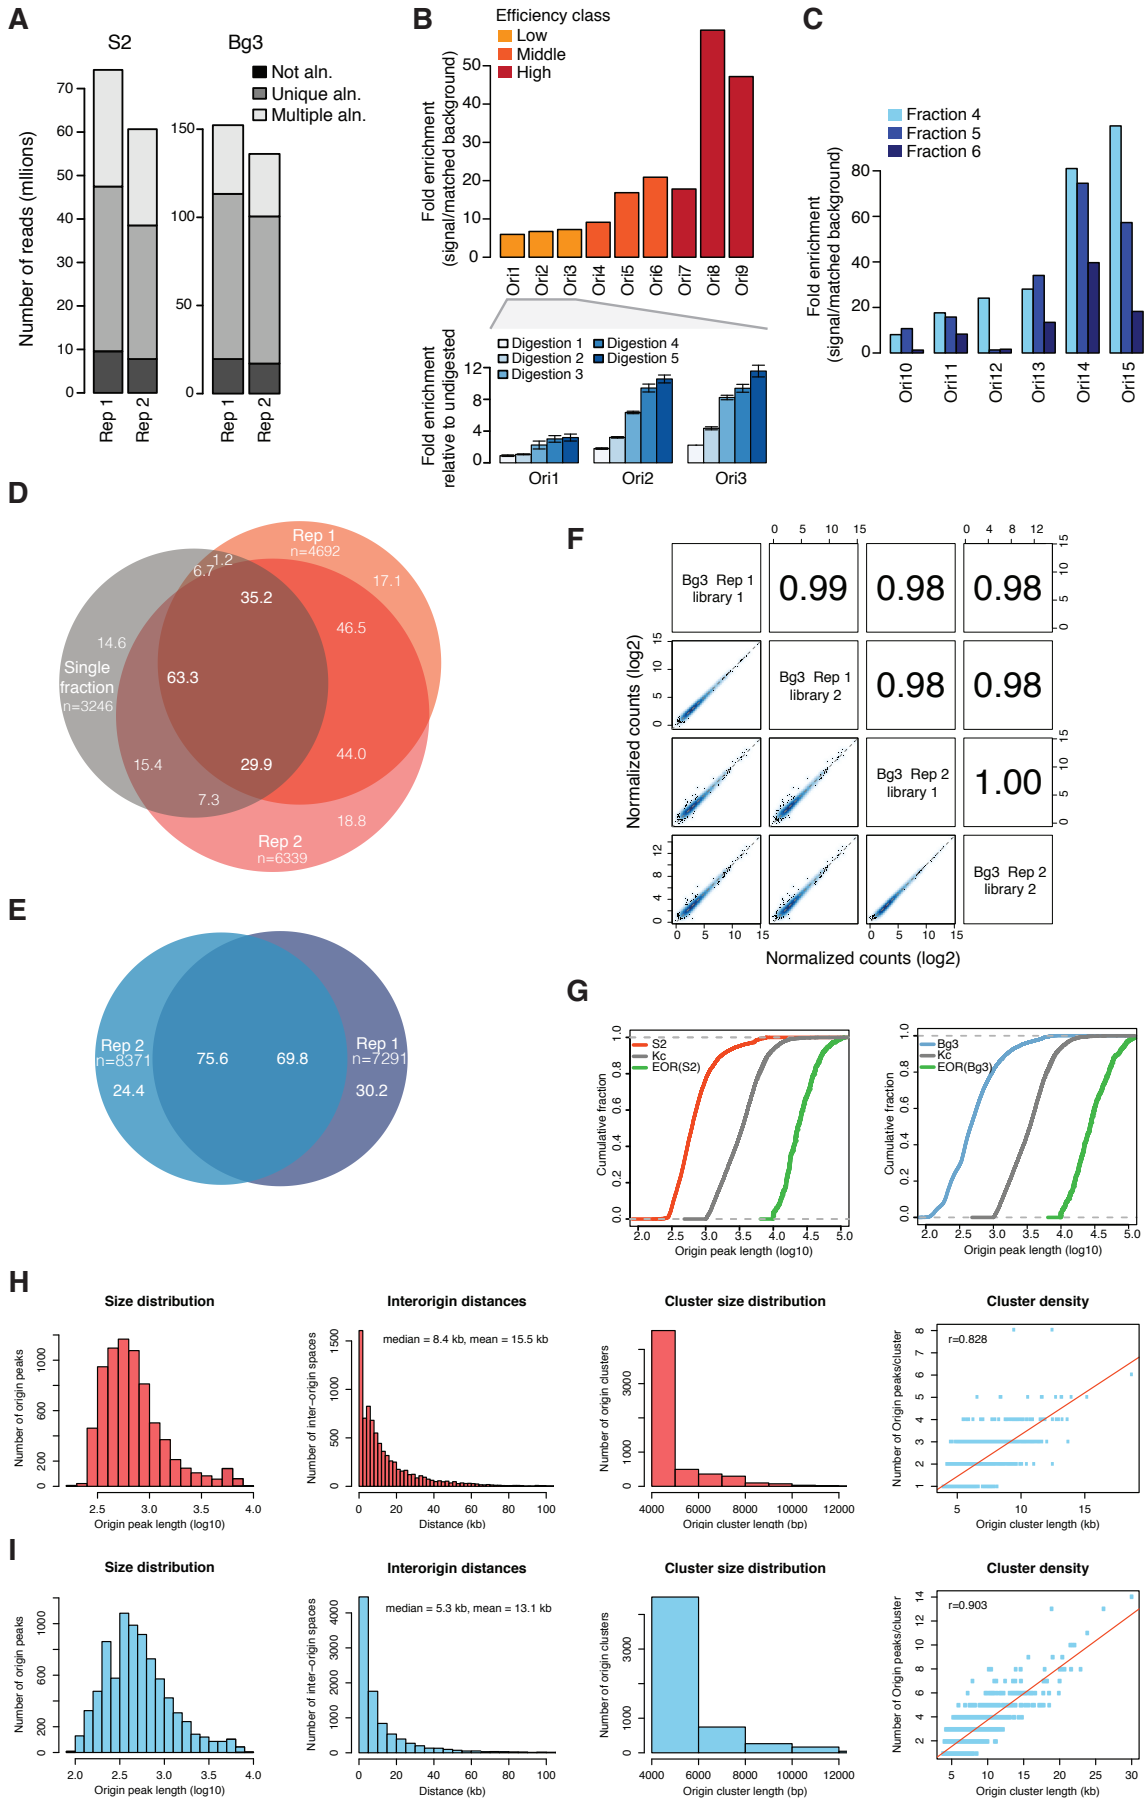

**Figure S1. Consistency between SNS-Seq replicates, SNS-qPCR validation and qualitative analysis of origin peaks (related to Figure 1).** (A) Short read alignment summary of SNS-Seq data from individual biological replicates (Rep1, Rep2) in S2 and Bg3 cells. (B) SNS-qPCR validation of SNS-Seq enrichments. Origins were partitioned in three efficiency classes based on quantiles of efficiency values estimated from S2 SNS-Seq data. The qPCR-based fold enrichments at three representative origins for each efficiency class are shown. Fold enrichments were computed with respect to a background genomic region located proximally to the origin peak. The inset shows the qPCR-based fold enrichments relative to undigested material after each round of Lexo digestion for the indicated origins from an independent biological replicate. Results are means  $\pm$  s.d. of two measurements. See Table S1 for primer sequences. (C) Same as (B), where origin peaks were detected in single-fraction SNS-Seq experiments and qPCR carried out on Fractions 4-6. The six origin peaks are located in the 175 kb genomic region illustrated in Figure 1E and were independently detected in all fractions. See Table S1 for primer sequences. (D) Percentage overlap of origin peaks identified within each S2 SNS-Seq biological replicate (Rep1, Rep2). The overlap with origin peaks identified by all fractions from single fraction SNS-Seq experiments (Single fraction) is also shown for comparison (see also Figure S3). All detected peaks were considered for this analysis. (E) Percentage overlap of origin peaks identified within each Bg3 SNS-Seq biological replicate. All detected peaks were considered for this analysis. (F) Pairwise correlations of Bg3 SNS-Seq read counts within the union of origin peaks identified in individual biological replicates. Read counts were normalized to library sizes. (G) Empirical cumulative distribution functions of origin peak lengths for the indicated sets of replication origins. EOR, early origin regions. (H) Size distribution of S2 origin peaks, cluster size distribution, cluster density and interorigin distances. For the analysis of origin clusters, origin peaks were resized to 4 kb windows centered on RSSs. (I) Same as (H) for Bg3 origin peaks. Correlation values ( $r$ ) are Pearson's correlation coefficients.

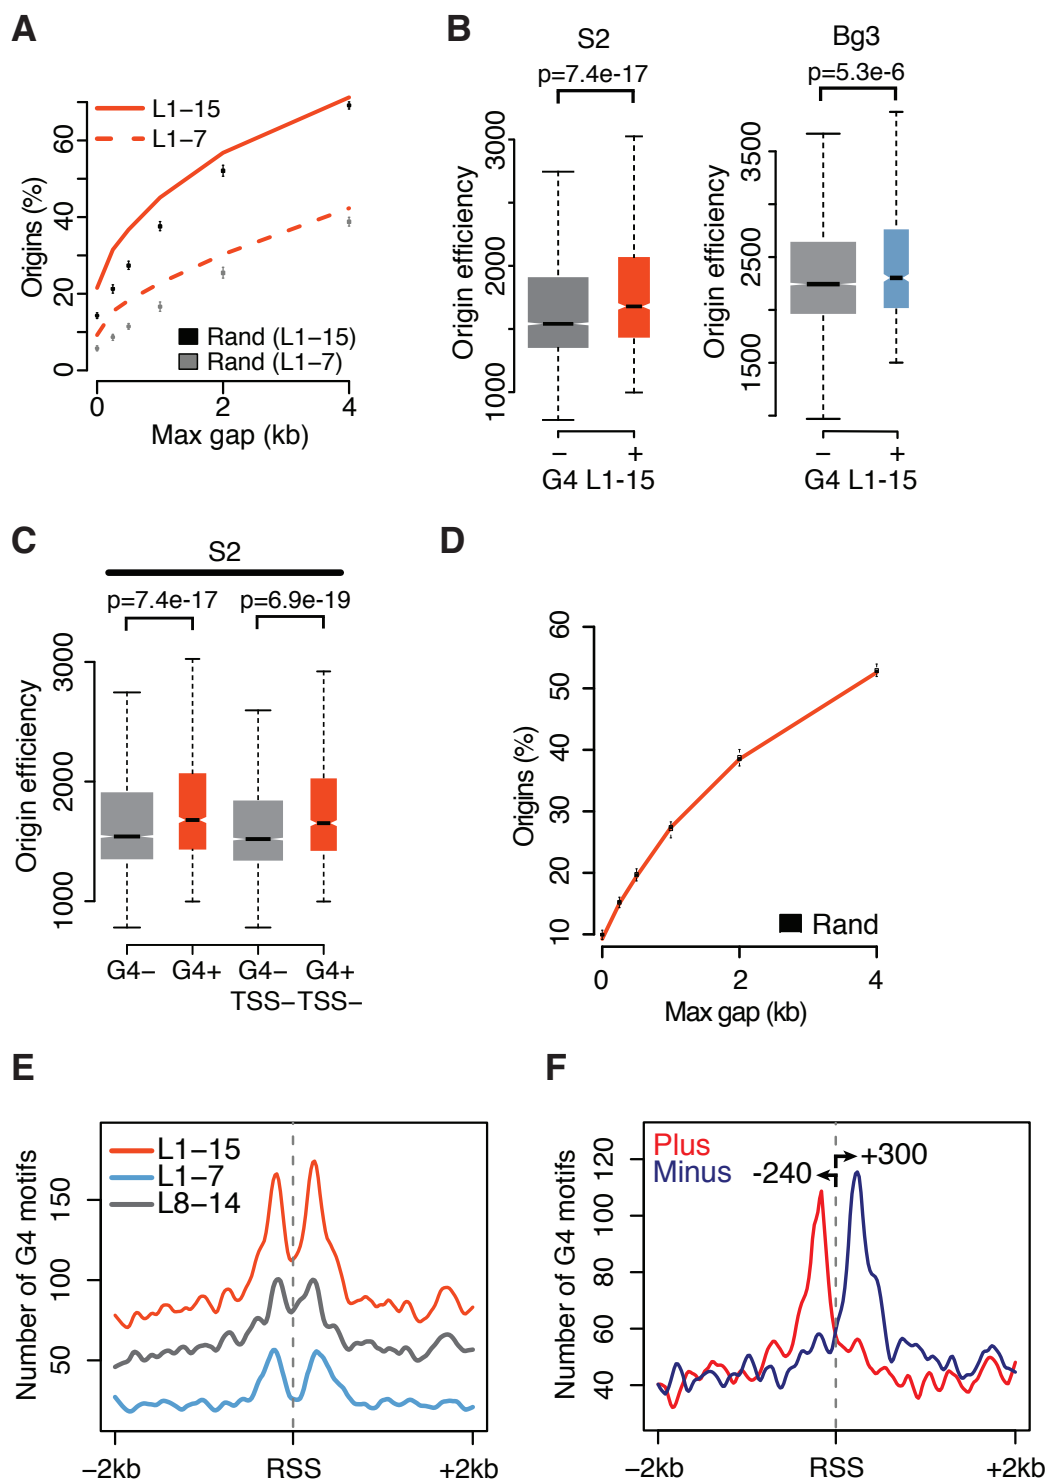

**Figure S2. Additional properties of G4-associated origins (related to Figure 2).** (A) Percentage overlap of S2 origin peaks with predicted G4 motifs and comparison of observed overlaps (lines) with random expectations (boxplots). (B) Efficiency of S2 and Bg3 origins associated (+) or not associated (-) with G4 L1-15 motifs. (C) Same as (B), but with origins further partitioned

by association with Transcription Start Sites (TSSs). (D) Percentage overlap of S2 origin peaks with TSSs and comparison of observed overlaps (line) with random expectations (boxplots). (E) Spatial distribution of G4 motifs within  $\pm 2$  kb of Bg3 RSSs. (F) Same as (E), for strand-specific annotation of G4 L1-15 motifs. Arrows indicate distances (bp) from the RSS. *p*-values are from Wilcoxon rank-sum test.

**A**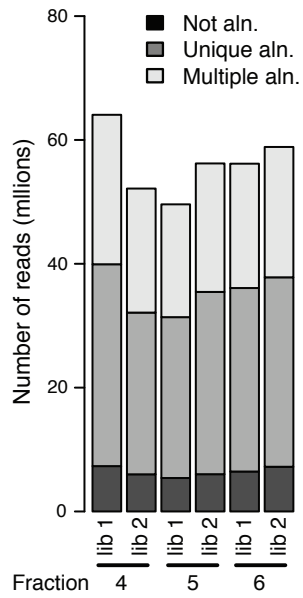**B**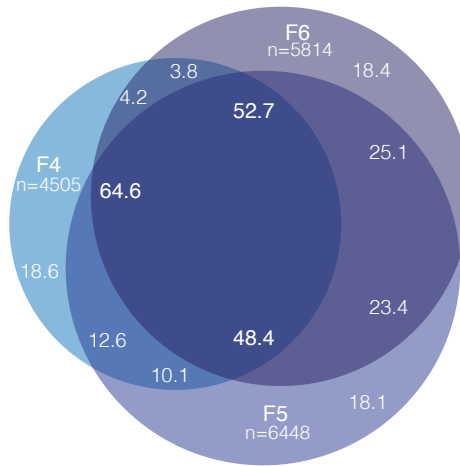**C**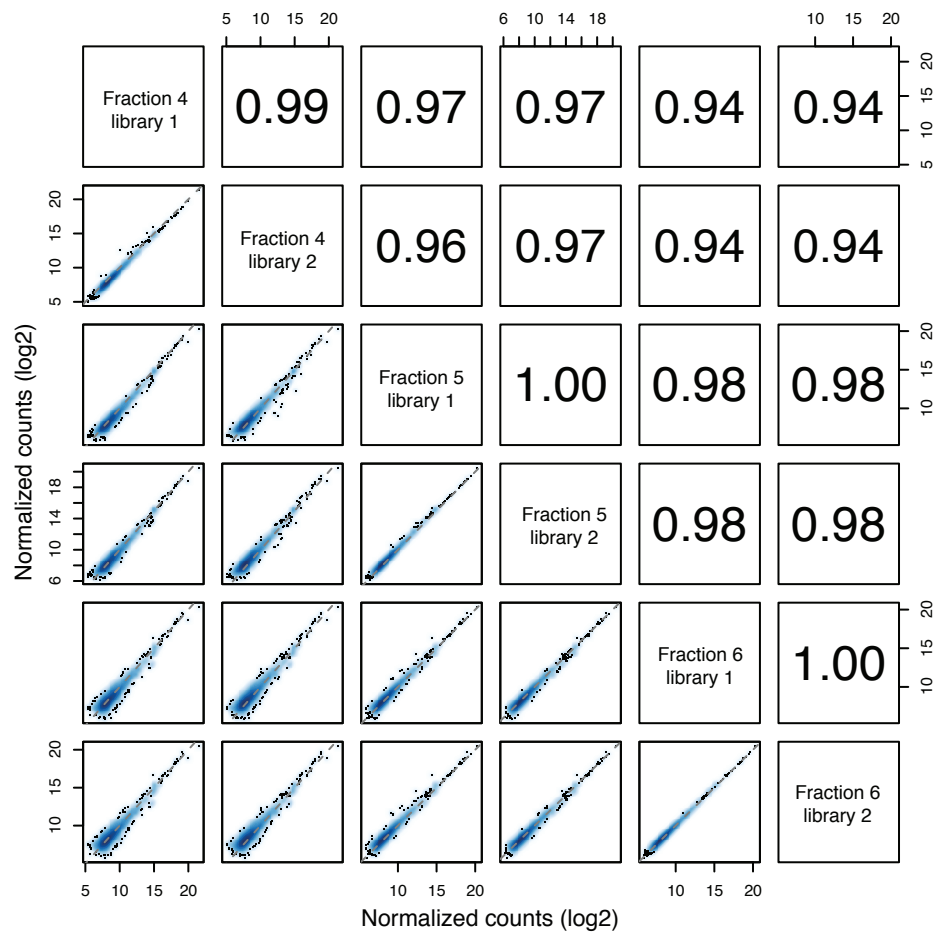

**Figure S3. Correspondence between fractions in single-fraction SNS-Seq experiments (related to Figure 3).** (A) Short read alignment summary of single fraction SNS-Seq data from individual fractions and technical replicates (lib) in S2 cells. (B) Percentage overlap of origin peaks identified within each fraction (F4-F6) from single fraction SNS-Seq data. (C) Pairwise correlations of single fraction SNS-Seq read counts within the union of origin peaks identified in each fraction. Read counts were normalized to library sizes. Correlation values are Pearson's correlation coefficients.

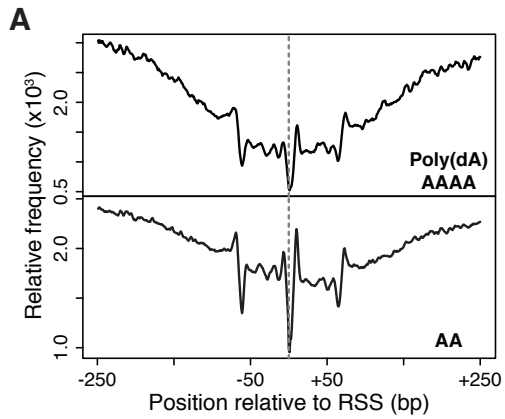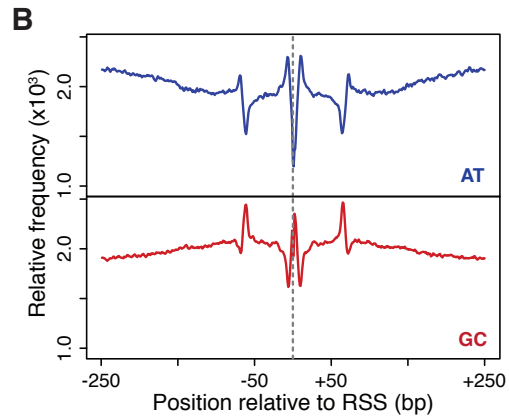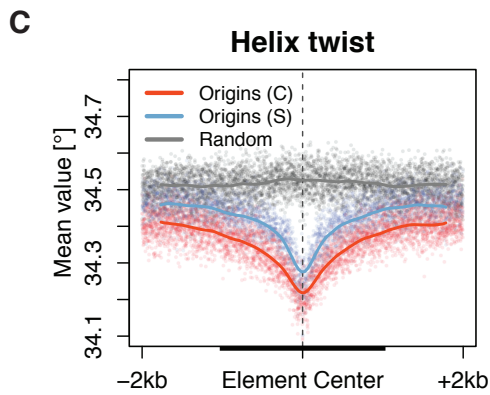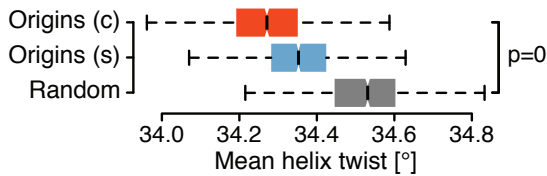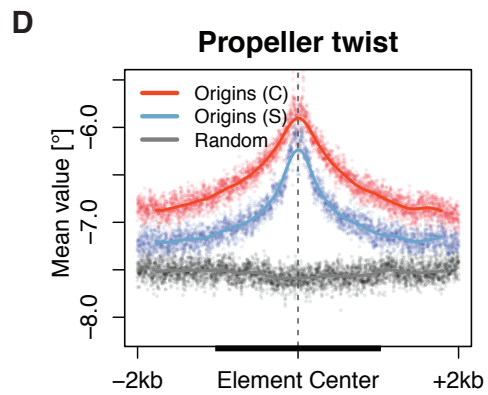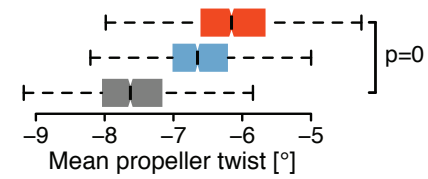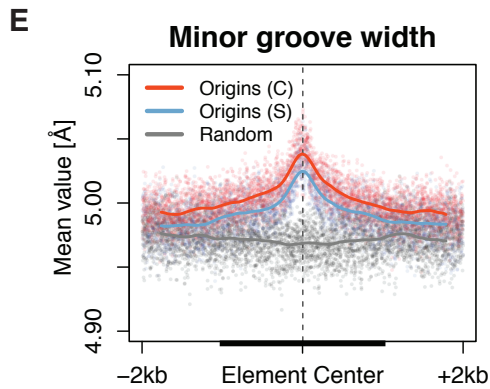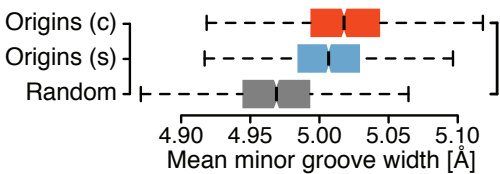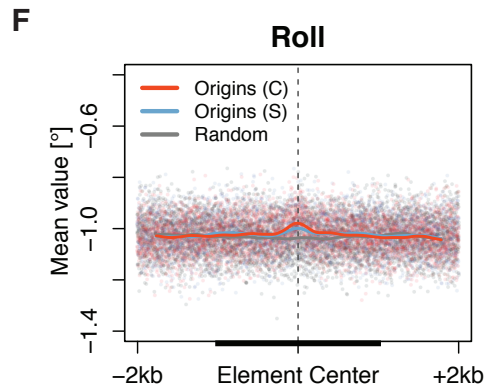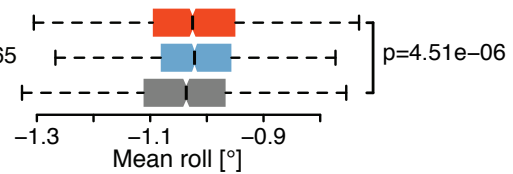



**Figure S4. Nucleosome container and DNA shape features at human replication origins (related to Figure 4).** (A) Relative frequency of AAAA polynucleotides and AA dinucleotides within  $\pm 250$  bp of HeLa RSSs. (B) Same as (A) for AT and GC dinucleotides. (C-F) Average of DNA shape features within  $\pm 2$  kb of RSSs for constitutive (C) and HeLa-specific (S) origins, and background regions. Solid lines are Loess fitted curves from single-nucleotide resolution shape predictions (dots). Boxplots of average feature values within 1 kb windows (thick black lines) are shown (bottom panels). *p*-values are from Wilcoxon rank-sum test.

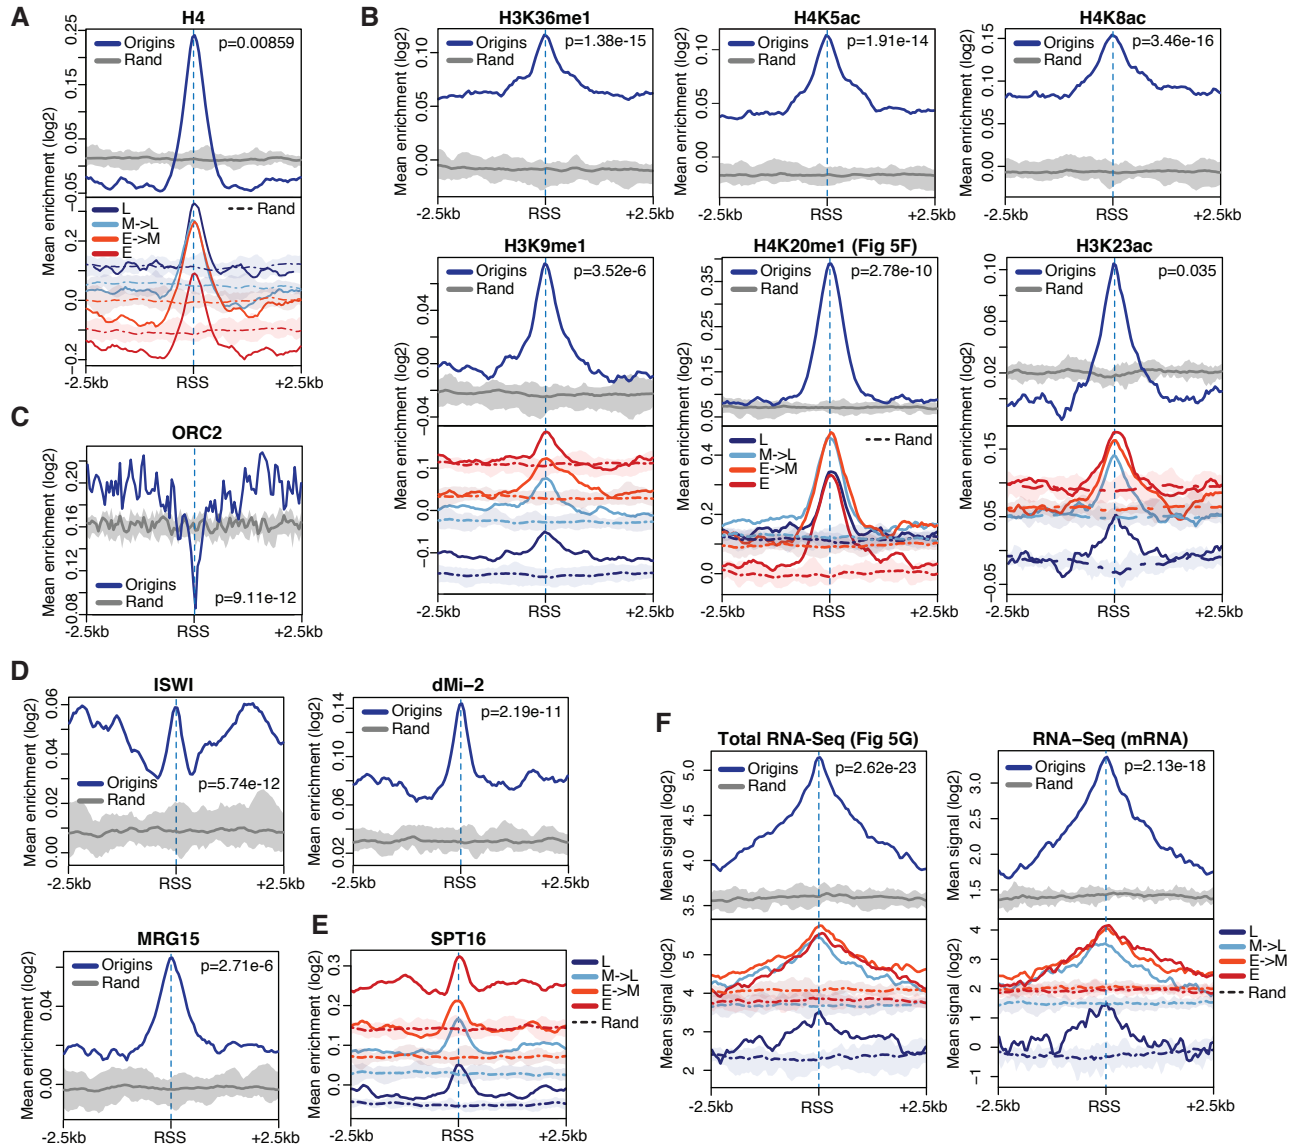

**Figure S5. Absence of timing-specific origin signatures and spatial distribution of additional chromatin features at RSSs (related to Figure 5).** (A) Average H4 enrichment (top) within  $\pm 2.5$  kb of S2 RSSs and within ten sets of randomized genomic regions (Rand). The thick gray line traces average background values. Bottom panels show further partitioning of the signal above in four timing classes (L: late S-phase; M: mid; E: early) based on replication timing quartiles. (B-F) Same as (A) for the indicated features. Reference to Figure 5 panels (main text) that are reproduced here for sake of clarity is provided.  $p$ -values are from Wilcoxon rank-sum test.

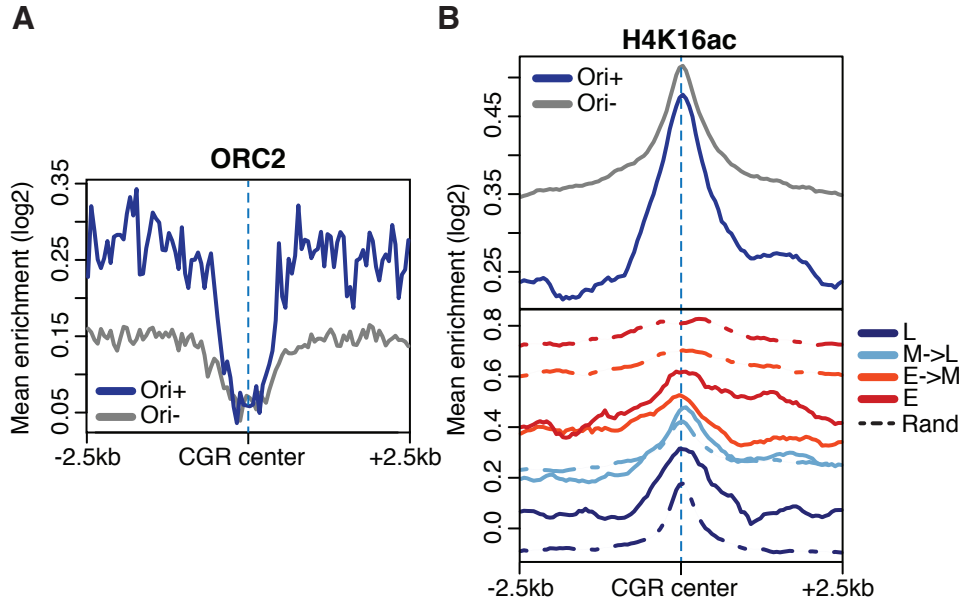

**Figure S6. Spatial distribution of ORC2 and timing partitioning of the H4K16ac mark at CGRs (related to Figure 6).** (A) Average ORC2 enrichment within  $\pm 2.5$  kb of CGR midpoints for origin-CGRs (Ori+) and origin-negative CGRs (Ori-). (B) Average H4K16ac enrichment (top) within  $\pm 2.5$  kb of S2 origin-CGR midpoints (Ori+) or of origin-negative CGRs (Ori-). Bottom panels show further partitioning of the signal above in four timing classes (L: late S-phase; M: mid; E: early) based on replication timing quartiles.

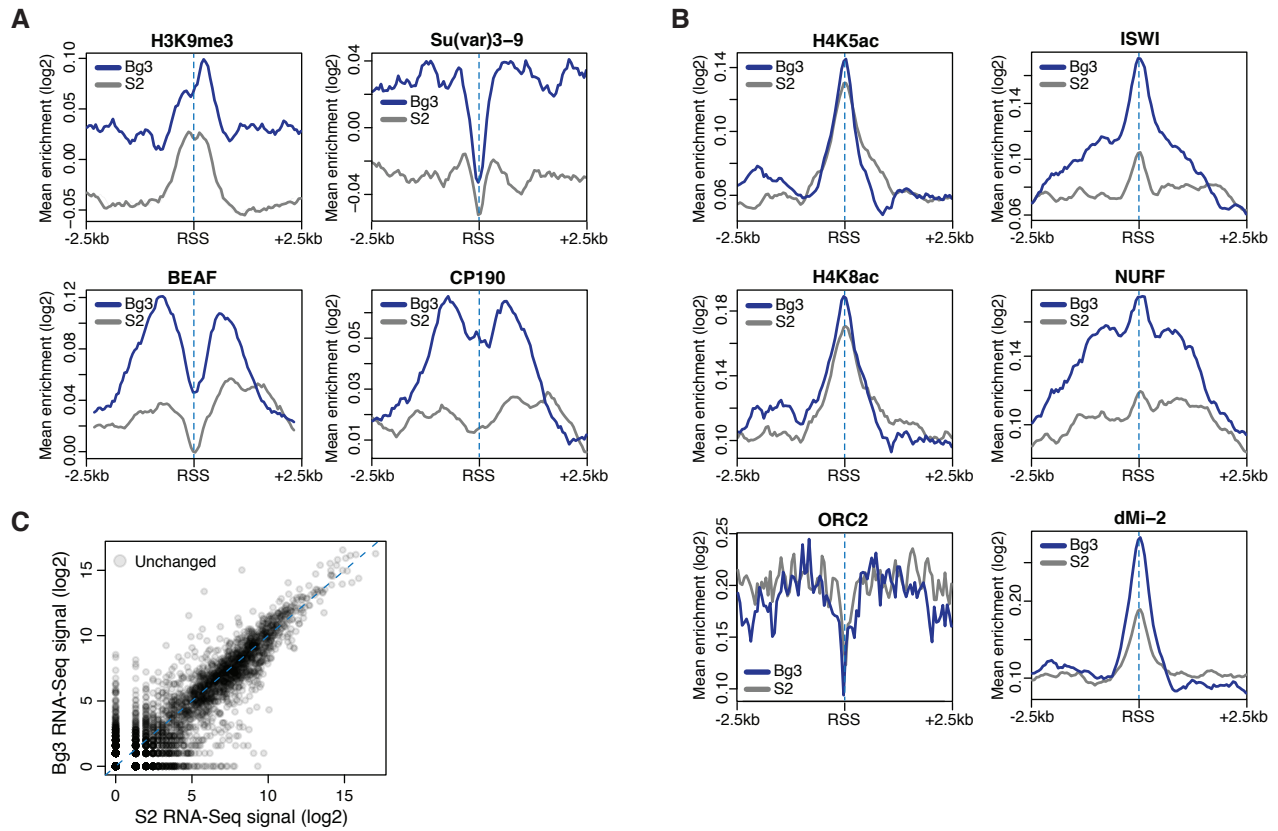

**Figure S7. Spatial distribution of heterochromatin features, insulators and additional chromatin features at Bg3-preferred origins (related to Figure 7).** (A) Average enrichments of heterochromatin marks and insulator proteins within  $\pm 2.5$  kb of RSSs of origin peaks solely identified in Bg3 cells (blue) and comparison with all S2 origin peaks (gray). (B) Same as (A) for the indicated features. (C) Scatter plot of S2 and Bg3 RNA-Seq signals at origins that were not significantly differentially activated (unchanged) in S2 and Bg3 cells.

## SUPPLEMENTAL TABLES AND LEGENDS

| Name of the genomic region | Primer sequence         | Tested on<br>(P: pool; S: single fractions) |
|----------------------------|-------------------------|---------------------------------------------|
| Ori 1                      | ACCACATTTTACTTGGGTTTAC  | P                                           |
|                            | CCTTGGGATTTCTGGGATCTGT  | P                                           |
| Background 1               | TGAATCAACTGAACTGCGTTAAA | P                                           |
|                            | CCATTTGGCTTCACATCCCATT  | P                                           |
| Ori 2                      | CAGGGCCATAAACAGGGGAA    | P                                           |
|                            | TGACTGCCAAGAAGAGCCAG    | P                                           |
| Background 2               | ACACAAACACAACCTCACCTGG  | P                                           |
|                            | AACGTGCTTGGCTTTCTGTG    | P                                           |
| Ori 3                      | GCAGAGACATGATCGCCGAA    | P                                           |
|                            | TTGTTTATTGGGTGCATGTG    | P                                           |
| Background 3               | ACGTACAACACAACCGACGA    | P                                           |
|                            | CAGGTTACAGGCCAAGCAAAA   | P                                           |
| Ori 4                      | CACAAAGTGCAGGTAGTCGC    | P                                           |
|                            | ATGCCCAGGAGATAGCCCTT    | P                                           |
| Background 4               | AAGAGCAACAACAATGGCGG    | P                                           |
|                            | GGCCAGTCCCAGTGTATAACG   | P                                           |
| Ori 5                      | CATCGGGAGGAAGCCACTTT    | P                                           |
|                            | AAGAGATGATCGAGCCAGGC    | P                                           |
| Background 5               | TCCCCAGTCTCCACTCTCC     | P                                           |
|                            | CCAGCGTGTTCCTGCGTTT     | P                                           |
| Ori 6                      | GCCGAGTCAAATGCCGAATG    | P                                           |
|                            | GTGTCCTATTGTTTCGTTTGTGA | P                                           |
| Background 6               | GGCGGACTGACTTAGGATCG    | P                                           |
|                            | TCACAGTACGCCCCAAAAGC    | P                                           |
| Ori 7                      | CAGTCATTGGCTGCACTCTT    | P                                           |
|                            | ACCCAAAATGCCTCGTCGAT    | P                                           |
| Background 7               | GAAGTACGCAATGGAGCAGC    | P                                           |
|                            | AGACCTGGGATTTTGGAGCG    | P                                           |
| Ori 8                      | TCGTATGCCTGGAACGAACG    | P                                           |
|                            | GCAATGTGGTTATGGCTAGCA   | P                                           |
| Background 8               | GCTCAGTAGTGCGTTCTTGC    | P                                           |
|                            | CGTTTCAAAGTCGCTCCATTCA  | P                                           |
| Ori 9                      | TCGTGTCGATGGAGTGGTG     | P                                           |
|                            | AACATGAGCTGGTCCGCTAC    | P                                           |
| Background 9               | GGCATCGTCTCCATCAGTCA    | P                                           |
|                            | AGTCGGAAGTCTGCCAAGTT    | P                                           |
| Ori 10                     | CATTCCGCCGCTTGTGTTT     | S                                           |
|                            | GTTGTAAAGGAAAGCGCCGA    | S                                           |
| Background 10              | GGCTCATTCTATTGCCGTGG    | S                                           |
|                            | TTTTAACAGCCCAGCAGACG    | S                                           |
| Ori 11                     | AGCTCAACTACTCATGAACGCA  | S                                           |
|                            | TGTTTGGCAGGAACGGTTCA    | S                                           |
| Background 11              | TCAAAGCAAATGTCGCCTGC    | S                                           |
|                            | CTGAAGTGGATCGCAGTGGT    | S                                           |

| <b>Name of the genomic region</b> | <b>Primer sequence</b> | <b>Tested on</b><br>(P: pool; S: single fractions) |
|-----------------------------------|------------------------|----------------------------------------------------|
| Ori 12                            | TGGGTTACGTGGTTTGGCAT   | S                                                  |
| (Background 11)                   | TGGCAAATGAGCAGCCTTA    | S                                                  |
| Ori 13                            | TGGCCGTGTTCTTAAGCGAT   | S                                                  |
| (Background 11)                   | GTTATGGGGTCGGTGGATGG   | S                                                  |
| Ori 14                            | GCTCACTCCGTTGCAAATCC   | S                                                  |
|                                   | CTCTGGCCGAAACATGTGTG   | S                                                  |
| Background 12                     | GCGCATCAATTCGGTCAGTC   | S                                                  |
|                                   | CCGTAACCATACCCATCCCG   | S                                                  |
| Ori 15                            | GATCGTTCATGGGCGAAACG   | S                                                  |
| (Background 12)                   | AGTCTTCCAGCAGCGAATCC   | S                                                  |

**Table S1. Primer used for the SNS-qPCR validation of origin peaks (related to Experimental Procedures).** This table provides the sequence of the primers used to validate origin peaks from standard as well as single-fraction SNS-Seq experiments in S2 cells. Matched background regions are indicated.

| <b>Feature name</b>                                     | <b>Symbol</b>   | <b>Source</b> | <b>Identifier</b>                                     |
|---------------------------------------------------------|-----------------|---------------|-------------------------------------------------------|
| absent, small, or homeotic discs, C-ter domain 1        | Ash1C           | GEO           | GSE30820<br>(Kockmann et al., 2013)                   |
| absent, small, or homeotic discs, N-ter domain 1        | Ash1N           | GEO           | GSE30820<br>(Kockmann et al., 2013)                   |
| Boundary element-associated factor of 32 kDa<br>CG10630 | BEAF<br>CG10630 | modENCODE     | modENCODE 274                                         |
| Chromator                                               | Chro            | modENCODE     | modENCODE 4176                                        |
| Centrosomal protein of 190 kDa                          | CP190           | modENCODE     | modENCODE 278                                         |
| CCCTC-binding factor                                    | CTCF            | modENCODE     | modENCODE 925                                         |
| dMi-2                                                   | dMi-2           | modENCODE     | modENCODE 283                                         |
| Sex combs extra                                         | dRING           | modENCODE     | modENCODE 3676                                        |
| Scm-related gene containing four mbt domains            | dSFMBT          | modENCODE     | modENCODE 928                                         |
| Enhancer of Zeste                                       | E(z)            | modENCODE     | modENCODE 3751                                        |
| female sterile (1) homeotic L                           | FshL            | GEO           | modENCODE 2988<br>GSE30820<br>(Kockmann et al., 2013) |
| female sterile (1) homeotic SL                          | FshSL           | GEO           | GSE30820<br>(Kockmann et al., 2013)                   |
| FK506-binding protein 2                                 | fkbp            |               | (Chen, Y. et al., in preparation)                     |
| Suppressor of variegation 205                           | HP1a            | modENCODE     | modENCODE 2668                                        |
| Heterochromatin Protein 1b                              | HP1b            | modENCODE     | modENCODE 941                                         |
| Heterochromatin Protein 1c                              | HP1c            | modENCODE     | modENCODE 943                                         |
| rhino                                                   | HP1d            | modENCODE     | modENCODE 4187                                        |
| Heterochromatin Protein 2                               | HP2             | modENCODE     | modENCODE 944                                         |
| Heterochromatin Protein 4                               | HP4             | modENCODE     | modENCODE 3948                                        |
| Heat shock protein 83                                   | Hsp90           | GEO           | GSE31226<br>(Sawarkar et al., 2012)                   |
| Imitation SWI                                           | ISWI            | modENCODE     | modENCODE 3032                                        |
| Suppressor of variegation 3-1                           | JIL-1           | modENCODE     | modENCODE 945                                         |
| Lysine (K)-specific demethylase 2                       | Kdm2            | modENCODE     | modENCODE 3033                                        |
| Histone demethylase 4A                                  | Kdm4A           | modENCODE     | modENCODE 3784                                        |
| MBD-R2                                                  | MBD-R2          | modENCODE     | modENCODE 946                                         |
| Minichromosome maintenance complex<br>component 2-7     | MCM             | SRA           | SRP006146                                             |
| maleless                                                | MLE             | modENCODE     | modENCODE 3788                                        |
| modifier of mdg4                                        | MOD2.2          | modENCODE     | modENCODE 2674                                        |
| MRG15                                                   | MRG15           | modENCODE     | modENCODE 3047                                        |
| male-specific lethal 1                                  | MSL1            | modENCODE     | modENCODE 3293                                        |
| Enhancer of bithorax                                    | NURF            | modENCODE     | modENCODE 947                                         |
| Origin Recognition Complex subunit 2                    | ORC2            | SRA           | SRP002091                                             |
| Polycomb                                                | Pc              | GEO           | GSE24521<br>(Enderle et al., 2011)                    |
| Polycomblike                                            | PCL             | modENCODE     | modENCODE 3049                                        |
| Polyhomeotic                                            | Ph              | GEO           | GSE24521<br>(Enderle et al., 2011)                    |
| pleiohomeotic                                           | Pho             | modENCODE     | modENCODE 3894                                        |
| Painting of fourth                                      | POF             | modENCODE     | modENCODE 3294                                        |
| RNA polymerase II 215 kD subunit                        | PolIII          | modENCODE     | modENCODE 329                                         |
| PR-Set7                                                 | PR-Set7         | modENCODE     | modENCODE 3054                                        |
| Posterior sex combs                                     | Psc             | GEO           | GSE24521<br>(Enderle et al., 2011)                    |

| Feature name                             | Symbol                  | Source    | Identifier                           |
|------------------------------------------|-------------------------|-----------|--------------------------------------|
| RPD3                                     | RPD3                    | modENCODE | modENCODE 3057                       |
| dre4                                     | SPT16                   | modENCODE | modENCODE 3058                       |
| Suppressor of Hairy wing                 | Su(Hw)                  | modENCODE | modENCODE 330                        |
| Suppressor of variegation 3-3            | Su(var)3-3              | modENCODE | modENCODE 3949                       |
| Suppressor of variegation 3-7            | Su(var)3-7              | modENCODE | modENCODE 2672                       |
| Suppressor of variegation 3-9            | Su(var)3-9              | modENCODE | modENCODE 2673                       |
| Topoisomerase II                         | TopoII                  | modENCODE | modENCODE 3945                       |
| Trithorax-like                           | Trl                     | modENCODE | modENCODE 285                        |
| Trithorax                                | Trx                     | GEO       | GSE24521 (Enderle et al., 2011)      |
| will die slowly                          | WDS                     | modENCODE | modENCODE 953                        |
| deformed wings                           | ZW5                     | modENCODE | modENCODE 3804                       |
| Histones<br>and<br>histone modifications | H1                      | modENCODE | modENCODE 3300                       |
|                                          | H2Av                    | modENCODE | modENCODE 2991                       |
|                                          | H2BK5ac                 | modENCODE | modENCODE 3283                       |
|                                          | H2BUb                   | modENCODE | modENCODE 290                        |
|                                          | H3                      | modENCODE | modENCODE 3301                       |
|                                          | H3                      | GEO       | GSE51598 (Bohla et al., 2014)        |
|                                          | H3K4me1                 | modENCODE | modENCODE 304                        |
|                                          | H3K4me2                 | modENCODE | modENCODE 2655                       |
|                                          | H3K4me3                 | modENCODE | modENCODE 305                        |
|                                          | H3K9ac                  | modENCODE | modENCODE 309                        |
|                                          | H3K9acS10P              | modENCODE | modENCODE 2660                       |
|                                          | H3K9me1                 | modENCODE | modENCODE 3770                       |
|                                          | H3K9me2                 | modENCODE | modENCODE 3011                       |
|                                          | H3K9me3                 | modENCODE | modENCODE 313                        |
|                                          | H3K18ac                 | modENCODE | modENCODE 292                        |
|                                          | H3K23ac                 | modENCODE | modENCODE 294                        |
|                                          | H3K27ac                 | modENCODE | modENCODE 296                        |
|                                          | H3K27me1                | modENCODE | modENCODE 3943                       |
|                                          | H3K27me2                | modENCODE | modENCODE 3000                       |
|                                          | H3K27me3                | modENCODE | modENCODE 298                        |
|                                          | H3K36me1                | modENCODE | modENCODE 3170                       |
|                                          | H3K36me3                | modENCODE | modENCODE 303                        |
|                                          | H3K79me1                | modENCODE | modENCODE 2658                       |
|                                          | H3K79me2                | modENCODE | modENCODE 307                        |
|                                          | H4                      | modENCODE | modENCODE 3304                       |
|                                          | H4acTetra               | modENCODE | modENCODE 201                        |
|                                          | H4K5ac                  | modENCODE | modENCODE 321                        |
|                                          | H4K8ac                  | modENCODE | modENCODE 322                        |
|                                          | H4K16ac                 | modENCODE | modENCODE 320                        |
|                                          | H4K20me1                | modENCODE | modENCODE 3014                       |
| Others                                   | DNase-Seq               | GEO       | GSE40739 (Arnold et al., 2013)       |
|                                          | MNase-Seq               | GEO       | GSE51599 (Bohla et al., 2014)        |
|                                          | RNA-Seq poly(A)+        | GEO       | GSE24521 (Enderle et al., 2011)      |
|                                          | Total RNA-Seq           | GEO       | GSE55872 (Ashwal-Fluss et al., 2014) |
|                                          | RNA-Seq poly(A)+, Bg3   | modENCODE | modENCODE 5954                       |
|                                          | Replication timing, S2  | GEO       | GSE17280 (Eaton et al., 2011)        |
|                                          | Replication timing, Bg3 | GEO       | GSE17281 (Eaton et al., 2011)        |
|                                          | RNA-Seq poly(A)+, HeLa  | ENCODE    | (ENCODE Project Consortium, 2012)    |



**Table S2. Detailed information on the genome-wide profiles included in the analysis (related to Figures 5-7).** This table provides details, source and accession numbers of all *Drosophila* and human data included in the analysis.

## SUPPLEMENTAL EXPERIMENTAL PROCEDURES

### SNS Purification

S2 and Bg3 cells were seeded in 11 x 145 mm tissue culture plates (Greiner) at a density of  $1.5 \times 10^6$  cells/ml 18-24 hours prior to SNS purification. Six sucrose gradients were prepared by carefully layering 1.6 ml each of 6 separate pre-cooled sucrose solutions (30%, 25%, 20%, 15%, 10% and 5% of sucrose w/v with RNase free Sucrose - Sigma 84097 in TEN300 - 10 mM Tris-HCl 7.9, 2 mM EDTA, 300 mM NaCl in RNase free water - Gibco 10977 hereinafter: water) in an ultracentrifuge tube (Beckman and Coulter 14x89 mm 331372) submerged in liquid nitrogen. Gradients were thawed overnight at 4°C prior to use, to generate linearity through limited mixing between layers. One additional gradient was prepared to assess linearity using an analog refractometer.

Exponentially growing S2 cells were washed twice with PBS (Gibco 10010023) and one 145 mm plate was covered in 5 mL of DNAzol (Invitrogen 10503-027). After cell lysis for 3 minutes at room temperature (RT), the DNAzol was transferred to the next plate and the process repeated for all plates. Proteinase K (Roche 03115844001) was added to the lysate/DNAzol mixture to a final concentration of 200  $\mu\text{g/ml}$  and incubated at 37°C for 2 hours. Precipitation of the genomic DNA (gDNA) was then carried out following the DNAzol user manual. The dried pellet was dissolved in 1 ml of TEN20 (10 mM Tris-HCl 7.9, 2 mM EDTA, 20 mM NaCl, 0.1% SDS, 500 U RNasin - Promega N2511) at 70°C. DNA does not dissolve above concentrations of 300-400  $\text{ng}/\mu\text{l}$  and when required, additional 500  $\mu\text{l}$  of TEN20 were added to maximize solubilization. After dissolving, DNA was heated to 90°C for 15 minutes and snap chilled in ice-water. Five gradients were loaded at 4°C with a maximum of 100  $\mu\text{g}$  (generally 60  $\mu\text{g}$ ) of gDNA each. One gradient was loaded with 5  $\mu\text{g}$  of DNA ladder (Thermo Scientific - SM0314) diluted to the same volume as the gDNA aliquots. The gradients were then transferred to a pre-cooled SW-41 Ti rotor (Beckman-Coulter) and centrifuged at 4°C and 26700 rpm (121000 rcf) for 21 hours.

Fractions were collected by carefully pipetting 1 ml off the top of the gradient at 4°C. Quality check and selection of fractions for downstream processing was performed by taking 150  $\mu\text{l}$  aliquots from each fraction of one gDNA gradient as well as from the ladder gradient. DNA was precipitated by adding 1/25 volume of 5 M NaCl and 2.5 volumes of 100% Ethanol, rotation at 4°C for 10 minutes and storage at -80°C for 30 minutes to overnight. The aliquots were subsequently spun at 21000 rcf and 4°C for 30 minutes, the supernatant removed and the pellet washed once with 500  $\mu\text{l}$  cold 70% Ethanol in water. After air drying, DNA was resuspended in loading buffer and size separated on an agarose gel. Fractions containing DNA fragments of sizes between 500 and 2500 bases were identified, pooled and precipitated as described above. For single fraction experiments, matched fraction numbers were pooled across gradients. Air-dried pellets were resuspended in 85  $\mu\text{l}$  of water with 100 U RNasin. 10  $\mu\text{l}$  were kept for qPCR analysis whereas, to the 75  $\mu\text{l}$ , 10  $\mu\text{l}$  T4 PNK 10x buffer (Fermentas EK003) were added, the sample incubated at 90°C for 5 minutes and snap chilled in ice-water. 10  $\mu\text{l}$  of 10 mM ATP (NEB P0756S) and 2  $\mu\text{l}$  of T4 PNK (Fermentas EK003) were added and samples were incubated at 37°C for 1 hour, followed by enzyme inactivation at 75°C for 15 minutes. DNA was precipitated as described above except for addition of 1/10 volume of 5 M NaCl. The air-dried pellets were resuspended in a mix of 77  $\mu\text{l}$  water, 2.5  $\mu\text{l}$  - 100 U RNasin, 10  $\mu\text{l}$  10x Exonuclease Buffer, 0.5  $\mu\text{l}$  100x BSA (NEB B9000S) and 10  $\mu\text{l}$  - 100 U lambda Exonuclease (Fermentas EN0562) and incubated overnight to 18 hours at 37°C. After addition of

100  $\mu$ l water and 200  $\mu$ l of PCI (Applichem A0889), the samples were mixed and centrifuged at 21000 rcf for 5 minutes. The upper phase was transferred and precipitated as specified above. T4 PNK phosphorylation, exonuclease digestion, phenol extraction and precipitation were repeated 4 to 5 times for each sample. Aliquots of digested and undigested DNA were run on a 1% agarose gel to assess digestion efficiency.

To prepare DNA for sequencing, pellets from exonuclease digestion were resuspended in 100  $\mu$ l TE buffer (10 mM Tris-HCl 8.0, 1 mM EDTA) with 1  $\mu$ l of RNase A (Roche, DNase free 11579681001). Digested DNA was extracted with Phenol-chloroform and precipitated as described above. Pellets were resuspended in a mix of 68  $\mu$ l water, 8  $\mu$ l 10x Reaction buffer and 4  $\mu$ l second strand synthesis enzyme mix (NEB NEBNext E6111S) and incubated at 16°C for 2.5 hours. 0.7 Volumes of Agencourt AMPure XP beads (Beckman-Coulter A63880) were added, briefly vortexed and incubated for 5 minutes at RT. The beads were collected on a magnetic rack and washed twice for 30 seconds with 70% Ethanol. Following the second wash, beads were air-dried, resuspended in 40  $\mu$ l of water and DNA was transferred to a new tube and subjected to library preparation. DNA libraries were prepared with the Nextera XT DNA Sample Preparation Kit (Illumina) following manufacturer's instructions. Each library was sequenced for 51 cycles in a single-end run on the HiSeq 2000 or 2500 system (Illumina) with SBS v3 and v4 chemistry, respectively.

## Computational Methods

### Annotations

Genomic coordinates of Kc origins (Cayrou et al., 2011) were retrieved from the DeOri database (Gao et al., 2012; <http://tubic.tju.edu.cn/deori/>). S2 and Bg3 early origin regions (Eaton et al., 2010) were retrieved from the modMine data warehouse (Contrino et al., 2012). These sites were mapped by BrdU immunoprecipitation from a synchronized cell population upon stalling replication forks by treatment with hydroxyurea. G-quadruplexes (G4) motif occurrences in the *Drosophila* and human genomes were predicted with QuadParser (Huppert and Balasubramanian, 2005) with consensus sequence G3+ N1-15 G3+ N1-15 G3+ N1-15 G3+. Three classes of G4 motifs, L1-15, L1-7 and L8-14, were then defined based on the G4 loop length. Transcription Start Sites (TSSs) coordinates were extracted from Ensembl gene annotations. CG-rich regions in the *Drosophila* genome were predicted according to (Gardiner-Garden and Frommer, 1987). DNase I hypersensitive sites in S2 cells were obtained from (Arnold et al., 2013).

### SNS-Seq data processing

S2 and Bg3 SNS-Seq reads were quality filtered and aligned to the dm3 *Drosophila* reference genome using Bowtie2 version 2.2.0 (Langmead et al., 2012) allowing one mismatch in seed alignment ( $-N\ 1\ -L\ 22$ ). The output was converted from SAM format to BAM using samtools version 0.1.19 (Li et al., 2009), and BAM files were sorted and indexed. Human SNS-Seq data from IMR-90, ESC h9 and HeLa cells (Besnard et al., 2012) were mapped to the hg19 human reference genome. As the polarity of leading strands at origins is expected to generate a bimodal enrichment pattern centered on the replication start site, origin peaks were called using MACS

version 1.4.1 (Zhang et al., 2008) with parameters  $-g \text{ dm} -m \ 5, \ 30$  for each replicate. Saturation of sequencing depth was evaluated using down-sampling and indicated that  $<40\%$  of the sequenced reads sufficed to detect the entire S2 and Bg3 origin repertoire. Pairwise correlations between read counts normalized to library sizes were evaluated for each sequencing library in the union of origin peaks from individual biological replicates (see Figure S1D). The set of origin peaks for each cell type was then defined as the union of identified peaks across replicates. Only peaks supported by unique alignments were considered further. For single fraction SNS-Seq data, technical replicates for each fraction were pooled prior to peak calling. Constitutive origins were defined as the intersection of S2, Bg3 and Kc (Cayrou et al., 2011) origin peaks.

All subsequent analysis were performed using R version  $\geq 3.1.0$  (R Core Team, 2014; <http://www.R-project.org/>) and BioConductor (Gentleman et al., 2004; <http://www.bioconductor.org>) packages with custom scripts, which are available upon request. BigWig coverage tracks of individual replicates and pooled libraries were generated at single base pair resolution using wavClusteR 2.0 (Comoglio et al., 2015). For each origin peak, the coverage function from pooled libraries was used to infer the position of the replication start site (RSS), which was set to the peak summit. Read summarization within origin peaks was performed with the GenomicRanges package (Lawrence et al., 2013). For each origin, the weighted average of the read counts for each biological replicate normalized to the size of the peak expressed in kb was used as a proxy for its firing efficiency in a cell population. Weights were set to relative library sizes.

The replication timing of origins was computed as the average normalized smoothed M-value of tiling array probesets mapping within the origin peak region.

### **RNA-Seq, DNase-Seq and MNase-Seq data processing**

RNA-Seq reads were aligned to the dm3 *Drosophila* reference genome using Tophat2 version 2.0.11 allowing one mismatch and reporting only one alignment for reads that map to multiple locations ( $-N \ 1 -g \ 1$ ). MNase-Seq, DNA-Seq and input samples were dumped to fastq format using the NCBI Short Read Archive Toolkit version 2.3.1. Reads were aligned to the dm3 *Drosophila* reference genome using Bowtie2 and output files were converted from SAM format to BAM, sorted and indexed as described above.

### **Background regions and randomization procedure**

Matched background regions were used to i) estimate SNS-Seq noise levels; ii) determine whether observed pairwise overlaps between replication origins across cell types or association of origin peaks with distinct genomic features (e.g. DHSs, G4, CG-rich regions) occurred significantly more frequently than random expectation; iii) computing control metaprofiles of chromatin features. Given an origin set, a matched background set was obtained by randomly sampling an equal number of genomic regions of the same length as the origin peaks from the mappable regions of the *Drosophila* genome. To account for the observed genomic distribution of replication origins, the number and sizes of origin peaks for each chromosome were matched by sampling an identical number of background regions exhibiting the same length as the origin peaks therein.

For analysis of pairwise overlaps across cell types or association of origin peaks with genomic features, 1000 background sets were generated. The number of intervals overlapping by at least one base pair, or separated by no more than 250, 500, 1000, 2000 and 4000 base pairs was com-

puted. Statistical significance of the overlap between two features was determined by computing the empirical  $p$ -value from the sampling distribution of the background set overlaps. To compute control metaprofiles of chromatin features, 10 background sets were used. The replication timing of background regions was computed as described above.

### **Origin DNA sequence content analysis**

DNA sequences of S2 and HeLa origins were extracted from the dm3 *Drosophila* reference genome and the hg19 human reference genome, respectively. The relative frequency of AAAA polynucleotides and AA, AT and GC dinucleotides was computed at single-nucleotide resolution in 500 bp windows centered on RSSs.

### **DNA shape features**

DNA sequences of *Drosophila* constitutive origins ( $n = 1286$ ) were extracted from the dm3 reference genome in 2 kb windows centered on the RSSs. DNA sequences from an equally sized random sample of background regions, and from a random sample of 500 TSSs were also retrieved. For human origins, the DNA sequences of a random sample ( $n = 2000$ ) of constitutive origins, HeLa-specific origins (i.e. origin peaks solely identified in HeLa SNS-Seq data) and background control regions were extracted from the hg19 human reference genome in 4 kb windows centered on the RSSs and on the range midpoint, respectively.

DNA shape features were derived from the high-throughput approach DNASHape, which is based on all-atom Monte-Carlo predictions (Zhou et al., 2013; <http://rohslab.cmb.usc.edu/DNASHape/>). The four DNA shape features used in this study were helix twist, propeller twist, minor groove width and roll.

### **Lasso logistic regression**

Logistic regression models are a class of probabilistic classifiers widely applied to binary classification problems in several scientific areas. Lasso logistic regression is an L1-regularized classifier that penalizes model complexity through an L1 norm penalty, thereby generating a sparse model representation, performing intrinsic feature selection and contrasting overfitting in high-dimensional feature spaces (Tibshirani, 1996). The model parameters are generally first estimated from a training set of labeled data points. The ensuing model is then used to classify new observations. Lasso logistic regression models were used to discriminate CG-rich regions coinciding with sites of replication initiation (origin-CGRs) from origin-negative CGRs (hereinafter CGR-classifier) and to discriminate *Drosophila* and human active replication origins from the rest of the *Drosophila* and human genomes, respectively (hereinafter origin-classifier).

The following sets of features were scored in a 500 bp window centered on each CGR midpoint (CGR-classifier) or on each RSS (origin-classifier):

1. DNA sequence content ( $k$ -mers,  $k \leq 4$ ).
2. Enrichment of chromatin binding proteins, histone modifications and DNA-Seq, and MNase-Seq, RNA-Seq signals. These values were computed essentially as described (Comoglio and Paro, 2014). See Table S1 for detailed information on the datasets.

3. Mean DNA shape feature values (origin classifier only). Helix twist, propeller twist, minor groove width and roll, were considered.

These sets of features were used alone or in combination for the *Drosophila* origin-classifier. In contrast, helix twist, propeller twist and RNA-Seq were used for the human origin-classifier. For statistical learning, a balanced set composed of an equal number of observations for each class was created. For the CGR-classifier, negative instances were randomly selected among the remaining origin-negative CGRs. For the *Drosophila* origin-classifier, constitutive origins were used as positive instances and matched background regions (see above) were used as negative instances. The observations were randomly partitioned in a training set (80%) and in a test set (20%) and the Lasso logistic regression models were trained on the training set with ten-fold cross validation using the glmnet implementation (Friedman et al., 2010). The value of the regularization parameter minimizing the cross-validated misclassification error was used to predict the class labels of the genomic regions in the test set. Model performances were evaluated by computing the area under receiver operating characteristic curves (AUC) using the ROCR package (Sing et al., 2005). To estimate feature importance and identify the most predictive set of features, we performed stability analysis of model coefficients by computing feature selection probabilities (i.e. normalized frequencies of non-zero coefficients) using the bootstrap-Lasso algorithm as previously described (Sakoparnig et al. 2012; Comoglio and Paro 2014). Features were ranked by selection probabilities and minimal models were then trained using predictors selected with a probability  $\geq 0.8$ .

### **Differential origin activity analysis**

Differential origin activity analysis was carried out using the DESeq2 package (Love et al., 2014). Read summarization was performed for each biological replicate in the union of S2 and Bg3 origin peaks. An adjusted  $p$ -value cutoff of  $10^{-5}$  was used to call significantly differentially activated origins.

## Supplemental References

- Arnold, C.D., Gerlach, D., Stelzer, C., Boryn, L.M., Rath, M., and Stark, A. (2013). Genome-wide quantitative enhancer activity maps identified by STARR-seq. *Science* 339, 1074-1077.
- Ashwal-Fluss, R., Meyer, M., Pamudurti, N.R., Ivanov, A., Bartok, O., Hanan, M., Evantal, N., Memczak, S., Rajewsky, N., and Kadener, S. (2014). circRNA biogenesis competes with pre-mRNA splicing. *Mol Cell* 56, 55-66.
- Besnard, E., Babled, A., Lapasset, L., Milhavet, O., Parrinello, H., Dantec, C., Marin, J.M., and Lemaitre, J.M. (2012). Unraveling cell type-specific and reprogrammable human replication origin signatures associated with G-quadruplex consensus motifs. *Nat. Struct. Mol. Biol.* 19, 837-844.
- Bohla, D., Herold, M., Panzer, I., Buxa, M.K., Ali, T., Demmers, J., Krger, M., Scharfe, M., Jarek, M., Bartkuhn, M., and Renkawitz, R. (2014). A functional insulator screen identifies NURF and dREAM components to be required for enhancer-blocking. *PLoS One* 9, e107765.
- Cayrou, C., Coulombe, P., Vigneron, A., Stanojcic, S., Ganier, O., Peiffer, I., Rivals, E., Puy, A., Laurent-Chabalier, S., Desprat, R., and Mchali, M. (2011). Genome-scale analysis of metazoan replication origins reveals their organization in specific but flexible sites defined by conserved features. *Genome Res.* 21, 1438-1449.
- Comoglio, F., and Paro, R. (2014). Combinatorial modeling of chromatin features quantitatively predicts DNA replication timing in *Drosophila*. *PLoS Comput. Biol.* 10, e1003419.
- Comoglio, F., Sievers, C. and Paro, R. (2015). Sensitive and highly resolved identification of RNA-protein interaction sites in PAR-CLIP data. *BMC Bioinformatics* 16, 32.
- Contrino, S., Smith, R.N., Butano, D., Carr, A., Hu, F., Lyne, R., Rutherford, K., Kalderimis, A., Sullivan, J., Carbon, S., Kephart, E.T., Lloyd, P., Stinson, E.O., Washington, N.L., Perry, M.D., Ruzanov, P., Zha, Z., Lewis, S.E., Stein, L.D., Micklem, G. (2012). modMine: flexible access to modENCODE data. *Nucleic Acids Res.* 40 D1082-1088.
- Eaton, M.L., Prinz, J.A., MacAlpine, H.K., Tretyakov, G., Kharchenko, P.V., and MacAlpine, D.M. (2011). Chromatin signatures of the *Drosophila* replication program. *Genome Res.* 21, 164-174.
- ENCODE Project Consortium (2012). An integrated encyclopedia of DNA elements in the human genome. *Nature* 489, 57-74.
- Enderle, D., Beisel, C., Stadler, M.B., Gerstung, M. Athri, P., and Paro, R. (2011). Polycomb preferentially targets stalled promoters of coding and noncoding transcripts. *Genome Res.* 21, 216-226.
- Friedman, J., Hastie, T., and Tibshirani, R. (2010). Regularization Paths for Generalized Linear Models via Coordinate Descent. *J. Stat. Softw.* 33, 1-22.
- Gao, F., Luo, H., and Zhang, C.T. (2012). DeOri: a database of eukaryotic DNA replication origins. *Bioinformatics* 28, 1551-1552.
- Gardiner-Garden, M., and Frommer, M. (1987). CpG islands in vertebrate genomes. *J. Mol. Biol.* 196, 261-282.
- Gentleman, R.C., Carey, V.J., Bates, D.M., Bolstad, B., Dettling, M., Dudoit, S., Ellis, B., Gautier, L., Ge, Y., Gentry, J., Hornik, K., Hothorn, T., Huber, W., Iacus, S., Irizarry, R., Leisch, F., Li,

C., Maechler, M., Rossini, A.J., Sawitzki, G., Smith, C., Smyth, G., Tierney, L., Yang, J.Y., and Zhang, J. (2004). Bioconductor: open software development for computational biology and bioinformatics. *Genome Biol.* 5, R80.

Huppert, J.L., and Balasubramanian, S. (2005). Prevalence of quadruplexes in the human genome. *Nucleic Acids Res.* 33, 2908-2916.

Kockmann, T., Gerstung, M., Schlumpf, T., Xhinzhou, Z., Hess, D., Beerenwinkel, N., Beisel, C., and Paro, R. (2013). The BET protein FSH functionally interacts with ASH1 to orchestrate global gene activity in *Drosophila*. *Genome Biol.* 14, R18.

Langmead, B., and Salzberg, S.L. (2012). Fast gapped-read alignment with Bowtie 2. *Nat. Methods* 9, 357-359.

Lawrence, M., Huber, W., Pags, H., Aboyoun, P., Carlson, M., Gentleman, R., Morgan, M.T., and Carey, V.J. (2013). Software for computing and annotating genomic ranges. *PLoS Comput. Biol.* 9, e1003118.

Li, H., Handsaker, B., Wysoker, A., Fennell, T., Ruan, J., Homer, N., Marth, G., Abecasis, G., Durbin, R., 1000 Genome Project Data Processing Subgroup. (2009). The Sequence Alignment/Map format and SAMtools. *Bioinformatics.* 25, 2078-2079.

Love, M.I., Huber, W., and Anders, S. (2014). Moderated estimation of fold change and dispersion for RNA-seq data with DESeq2. *Genome Biol.* 15, 550.

R Core Team (2014). R: A language and environment for statistical computing. R Foundation for Statistical Computing, Vienna, Austria.

Sakoparnig, T., Kockmann, T., Paro, R., Beisel, C., and Beerenwinkel, N. (2012). Binding profiles of chromatin-modifying proteins are predictive for transcriptional activity and promoter-proximal pausing. *J. Comput. Biol.* 19, 126-138.

Sawarkar, R., Sievers, C., and Paro, R. (2012). Hsp90 globally targets paused RNA polymerase to regulate gene expression in response to environmental stimuli. *Cell* 149, 807-818.

Sing, T., Sander, O., Beerenwinkel, N., and Lengauer, T. (2005). ROCr: visualizing classifier performance in R. *Bioinformatics* 21, 3940-3941.

Tibshirani, R. (1996). Regression shrinkage and selection via the lasso. *J. R. Stat. Soc. B* 58, 267-288.

Zhang, Y., Liu, T., Meyer, C.A., Eeckhoute, J., Johnson, D.S., Bernstein, B.E., Nusbaum, C., Myers, R.M., Brown, M., Li, W., and Liu, X.S. (2008). Model-based analysis of ChIP-Seq (MACS). *Genome Biol.* 9, R137.

Zhou, T., Yang, L., Lu, Y., Dror, I., Dantas Machado, A.C., Ghane, T., Di Felice, R., and Rohs, R. (2013). DNashape: a method for the high-throughput prediction of DNA structural features on a genomic scale. *Nucleic Acids Res.* 41, W56-62.
